# Supplementary material
Source: Royal Society of Chemistry journal article supplement (doi:10.1039/d6dt00721j)
Supplement: d6dt00721j1.pdf [file d6dt00721j1.pdf]

## Supporting information for the article

### Crystal Structure and Properties of Acetamidinium Lead Bromide: A New Member of the $A_3PbBr_5$ Halide Family

Huanzhou Wang,<sup>‡a</sup> Andrey A. Petrov,<sup>\*‡ab</sup> Andrey V. Petrov<sup>c</sup>, Mingming Li<sup>\*a</sup> Sergey A. Fateev<sup>\*a</sup>

a. Faculty of Materials Science, Shenzhen MSU-BIT University, 518172 Shenzhen, China

b. Laboratory of New Materials for Solar Energetics, Department of Materials Science, Lomonosov Moscow State University, 119991 Moscow, Russia

c. Institute of Chemistry, Saint Petersburg State University, 199034 Saint Petersburg, Russia

<sup>‡</sup> The first two authors contributed equally to this work.

**Table S1. Crystal data and structure refinement for  $Aca_3PbBr_5$  at 100 K and 298 K.**

|                                                |                                                                     |                                                                     |
|------------------------------------------------|---------------------------------------------------------------------|---------------------------------------------------------------------|
| Empirical formula                              | $C_6H_{21}Br_5N_6Pb$                                                | $C_6H_{21}Br_5N_6Pb$                                                |
| Formula weight                                 | 784.03                                                              | 784.03                                                              |
| Temperature/K                                  | <b>100</b>                                                          | <b>298</b>                                                          |
| Crystal system                                 | monoclinic                                                          | monoclinic                                                          |
| Space group                                    | $P2_1/c$                                                            | $P2_1/c$                                                            |
| a/Å                                            | 18.9112(13)                                                         | 18.550(3)                                                           |
| b/Å                                            | 9.0412(6)                                                           | 9.2337(15)                                                          |
| c/Å                                            | 11.7688(8)                                                          | 11.9729(18)                                                         |
| $\alpha/^\circ$                                | 90                                                                  | 90                                                                  |
| $\beta/^\circ$                                 | 100.974(3)                                                          | 100.272(6)                                                          |
| $\gamma/^\circ$                                | 90                                                                  | 90                                                                  |
| Volume/Å <sup>3</sup>                          | 1975.4(2)                                                           | 2017.9(6)                                                           |
| Z                                              | 4                                                                   | 4                                                                   |
| $\rho_{\text{calc}}/\text{g}\cdot\text{cm}^3$  | 2.636                                                               | 2.581                                                               |
| $\mu/\text{mm}^{-1}$                           | 18.649                                                              | 18.256                                                              |
| F(000)                                         | 1424.0                                                              | 1424.0                                                              |
| Crystal size/mm <sup>3</sup>                   | 0.38 × 0.32 × 0.29                                                  | 0.26 × 0.24 × 0.19                                                  |
| Radiation                                      | MoK $\alpha$ ( $\lambda = 0.71073$ )                                | MoK $\alpha$ ( $\lambda = 0.71073$ )                                |
| 2 $\theta$ range for data collection/ $^\circ$ | 4.388 to 54.968                                                     | 5.606 to 60.976                                                     |
| Index ranges                                   | -24 ≤ h ≤ 24, -11 ≤ k ≤ 11,<br>-13 ≤ l ≤ 15                         | -26 ≤ h ≤ 26, -13 ≤ k ≤ 13,<br>-17 ≤ l ≤ 17                         |
| Reflections collected                          | 40772                                                               | 76176                                                               |
| Independent reflections                        | 4527 [ $R_{\text{int}} = 0.0779$ ,<br>$R_{\text{sigma}} = 0.0423$ ] | 6140 [ $R_{\text{int}} = 0.0823$ ,<br>$R_{\text{sigma}} = 0.0376$ ] |
| Data/restraints/parameters                     | 4527/0/167                                                          | 6140/0/167                                                          |
| Goodness-of-fit on $F^2$                       | 1.053                                                               | 1.069                                                               |
| Final R indexes [ $I \geq 2\sigma(I)$ ]        | $R_1 = 0.0368$ , $wR_2 = 0.0963$                                    | $R_1 = 0.0424$ , $wR_2 = 0.1116$                                    |
| Final R indexes [all data]                     | $R_1 = 0.0428$ , $wR_2 = 0.0997$                                    | $R_1 = 0.0648$ , $wR_2 = 0.1222$                                    |
| Largest diff. peak/hole / e Å <sup>-3</sup>    | 3.45/-2.59                                                          | 2.60/-2.22                                                          |

**Table S2. Fractional Atomic Coordinates ( $\times 10^4$ ) and Equivalent Isotropic Displacement Parameters ( $\text{\AA}^2 \times 10^3$ ) for  $\text{Aca}_3\text{PbBr}_5$  (298 K).  $U_{\text{eq}}$  is defined as 1/3 of the trace of the orthogonalised  $U_{ij}$  tensor.**

| Atom | x         | y          | z         | $U_{\text{eq}}$ |
|------|-----------|------------|-----------|-----------------|
| Pb1  | 2289.1(2) | 2316.5(3)  | 3068.4(2) | 31.84(10)       |
| Br1  | 2199.7(5) | 2017.7(10) | 538.0(6)  | 49.6(2)         |
| Br2  | 1258.0(5) | -143.0(11) | 3029.7(8) | 60.0(2)         |
| Br3  | 3646.5(5) | 394.0(11)  | 3644.1(9) | 62.4(3)         |
| Br4  | 1139.8(5) | 4515.4(10) | 2479.3(8) | 55.8(2)         |
| Br5  | 3396.7(6) | 4710.2(11) | 3107.4(9) | 63.8(3)         |
| N2   | 864(4)    | 5851(8)    | 5171(6)   | 52.2(17)        |
| N4   | 2324(5)   | 8919(9)    | 5614(6)   | 69(2)           |
| N6   | 4105(5)   | 2397(13)   | 6073(10)  | 98(4)           |
| N1   | 119(4)    | 6906(8)    | 3669(6)   | 51.4(17)        |
| C1   | 358(4)    | 6792(8)    | 4774(6)   | 39.1(15)        |
| N3   | 2382(5)   | 7209(8)    | 4256(7)   | 62(2)           |
| C3   | 2572(5)   | 7702(9)    | 5300(7)   | 48.7(19)        |
| C4   | 3099(7)   | 6831(13)   | 6134(10)  | 84(3)           |
| C5   | 4718(5)   | 3077(12)   | 6155(8)   | 59(2)           |
| N5   | 4943(5)   | 3957(12)   | 7010(8)   | 88(3)           |
| C2   | 39(6)     | 7737(11)   | 5539(9)   | 64(3)           |
| C6   | 5172(6)   | 2865(11)   | 5299(9)   | 63(2)           |

**Table S3. Bond Lengths for  $\text{Aca}_3\text{PbBr}_5$  (298 K).**

| Atom(1) | Atom(2)          | Length/ $\text{\AA}$ |  | Atom(1) | Atom(2) | Length/ $\text{\AA}$ |
|---------|------------------|----------------------|--|---------|---------|----------------------|
| Pb1     | Br1 <sup>1</sup> | 3.0533(9)            |  | N6      | C5      | 1.287(13)            |
| Pb1     | Br1              | 3.0172(8)            |  | N1      | C1      | 1.322(10)            |
| Pb1     | Br2              | 2.9642(10)           |  | C1      | C2      | 1.465(12)            |
| Pb1     | Br3              | 3.0573(10)           |  | N3      | C3      | 1.318(11)            |
| Pb1     | Br4              | 2.9375(10)           |  | C3      | C4      | 1.499(14)            |
| Pb1     | Br5              | 3.0123(10)           |  | C5      | N5      | 1.314(14)            |
| N2      | C1               | 1.305(10)            |  | C5      | C6      | 1.451(14)            |
| N4      | C3               | 1.296(11)            |  |         |         |                      |

$$^1+x, 1/2-y, 1/2+z$$

**Table S4. Bond Angles for Aca<sub>3</sub>PbBr<sub>5</sub> (298 K).**

| Atom(1)          | Atom(2) | Atom(3)          | Angle/°   | Atom(1) | Atom(2) | Atom(3)          | Angle/°   |
|------------------|---------|------------------|-----------|---------|---------|------------------|-----------|
| Br1              | Pb1     | Br1 <sup>1</sup> | 171.13(3) | Br5     | Pb1     | Br1 <sup>1</sup> | 89.54(3)  |
| Br1              | Pb1     | Br3              | 93.95(3)  | Br5     | Pb1     | Br3              | 83.71(3)  |
| Br1 <sup>1</sup> | Pb1     | Br3              | 94.78(3)  | Pb1     | Br1     | Pb1 <sup>2</sup> | 162.03(4) |
| Br2              | Pb1     | Br1              | 89.68(3)  | N2      | C1      | N1               | 120.6(8)  |
| Br2              | Pb1     | Br1 <sup>1</sup> | 91.32(3)  | N2      | C1      | C2               | 120.9(8)  |
| Br2              | Pb1     | Br3              | 93.55(3)  | N1      | C1      | C2               | 118.5(8)  |
| Br2              | Pb1     | Br5              | 177.19(3) | N4      | C3      | N3               | 121.7(9)  |
| Br4              | Pb1     | Br1              | 85.09(3)  | N4      | C3      | C4               | 119.7(9)  |
| Br4              | Pb1     | Br1 <sup>1</sup> | 86.04(3)  | N3      | C3      | C4               | 118.6(9)  |
| Br4              | Pb1     | Br2              | 95.00(3)  | N6      | C5      | N5               | 120.9(11) |
| Br4              | Pb1     | Br3              | 171.39(3) | N6      | C5      | C6               | 119.7(11) |
| Br4              | Pb1     | Br5              | 87.73(3)  | N5      | C5      | C6               | 119.4(9)  |
| Br5              | Pb1     | Br1              | 89.88(3)  |         |         |                  |           |

<sup>1</sup>+X,1/2-Y,1/2+Z; <sup>2</sup>+X,1/2-Y,-1/2+Z

**Table S5. Fractional Atomic Coordinates ( $\times 10^4$ ) and Equivalent Isotropic Displacement Parameters ( $\text{\AA}^2 \times 10^3$ ) for  $\text{Aca}_3\text{PbBr}_5$  (100 K).  $U_{\text{eq}}$  is defined as 1/3 of the trace of the orthogonalised  $U_{ij}$  tensor.**

| Atom | x         | y         | z         | $U_{\text{eq}}$ |
|------|-----------|-----------|-----------|-----------------|
| Pb1  | 2280.4(2) | 2779.7(2) | 3145.3(2) | 12.96(10)       |
| Br1  | 1171.5(3) | 487.8(6)  | 2452.2(5) | 17.01(15)       |
| Br2  | 3402.8(3) | 356.3(6)  | 3139.7(5) | 16.88(15)       |
| Br3  | 3648.6(3) | 4680.9(7) | 3780.5(5) | 20.00(15)       |
| Br4  | 1207.6(3) | 5182.1(6) | 3131.3(5) | 18.07(15)       |
| Br5  | 2217.3(3) | 3171.6(7) | 644.7(5)  | 18.86(15)       |
| N2   | 94(3)     | -1844(6)  | 3642(4)   | 19.6(11)        |
| N4   | 867(3)    | -884(6)   | 5177(5)   | 20.4(11)        |
| N6   | -12(4)    | -2656(7)  | 5556(6)   | 22.0(14)        |
| N1   | 336(3)    | -1744(6)  | 4757(5)   | 17.4(12)        |
| C1   | 4058(3)   | 2415(7)   | 6143(5)   | 29.6(14)        |
| N3   | 4924(3)   | 892(6)    | 7118(5)   | 28.8(13)        |
| C3   | 5111(4)   | 2023(7)   | 5332(6)   | 22.9(14)        |
| C4   | 4680(3)   | 1771(7)   | 6239(6)   | 19.4(13)        |
| C5   | 2370(3)   | 7856(6)   | 4294(5)   | 21.7(12)        |
| N5   | 2334(3)   | 6127(6)   | 5688(4)   | 23.2(12)        |
| C2   | 3250(4)   | 8014(7)   | 6046(6)   | 29.5(16)        |
| C6   | 2623(4)   | 7303(6)   | 5309(6)   | 18.7(13)        |

**Table S6. Bond Lengths for  $\text{Aca}_3\text{PbBr}_5$  (100 K).**

| Atom(1) | Atom(2)          | Length/ $\text{\AA}$ |  | Atom(1) | Atom(2) | Length/ $\text{\AA}$ |
|---------|------------------|----------------------|--|---------|---------|----------------------|
| Pb1     | Br1              | 2.9506(6)            |  | C1      | C2      | 1.494(8)             |
| Pb1     | Br2              | 3.0514(6)            |  | N3      | C4      | 1.299(8)             |
| Pb1     | Br3              | 3.0776(7)            |  | N4      | C4      | 1.317(8)             |
| Pb1     | Br4              | 2.9702(6)            |  | C3      | C4      | 1.479(9)             |
| Pb1     | Br5 <sup>1</sup> | 3.0888(6)            |  | N5      | C6      | 1.300(8)             |
| Pb1     | Br5              | 2.9439(6)            |  | N6      | C6      | 1.313(8)             |
| N1      | C2               | 1.308(8)             |  | C5      | C6      | 1.477(9)             |
| N2      | C2               | 1.292(8)             |  |         |         |                      |

$$^1_{+X,1/2-Y,1/2+Z}$$

**Table S7. Bond Angles for Aca<sub>3</sub>PbBr<sub>5</sub> (100 K).**

| Atom(1) | Atom(2) | Atom(3)          | Angle/°     | Atom(1) | Atom(2) | Atom(3)          | Angle/°     |
|---------|---------|------------------|-------------|---------|---------|------------------|-------------|
| Br1     | Pb1     | Br2              | 87.320(18)  | Br5     | Pb1     | Br4              | 90.503(18)  |
| Br1     | Pb1     | Br3              | 168.474(19) | Br5     | Pb1     | Br5 <sup>1</sup> | 169.724(14) |
| Br1     | Pb1     | Br4              | 93.626(18)  | Pb1     | Br5     | Pb1 <sup>2</sup> | 156.48(2)   |
| Br1     | Pb1     | Br5 <sup>1</sup> | 85.033(17)  | N1      | C2      | C1               | 118.8(6)    |
| Br2     | Pb1     | Br3              | 81.291(17)  | N2      | C2      | N1               | 121.6(6)    |
| Br2     | Pb1     | Br5 <sup>1</sup> | 87.428(17)  | N2      | C2      | C1               | 119.7(6)    |
| Br3     | Pb1     | Br5 <sup>1</sup> | 96.160(18)  | N3      | C4      | N4               | 121.0(6)    |
| Br4     | Pb1     | Br2              | 178.815(18) | N3      | C4      | C3               | 118.9(6)    |
| Br4     | Pb1     | Br3              | 97.741(18)  | N4      | C4      | C3               | 120.1(6)    |
| Br4     | Pb1     | Br5 <sup>1</sup> | 93.364(18)  | N5      | C6      | N6               | 121.3(6)    |
| Br5     | Pb1     | Br1              | 85.224(18)  | N5      | C6      | C5               | 119.1(6)    |
| Br5     | Pb1     | Br2              | 88.863(18)  | N6      | C6      | C5               | 119.6(6)    |
| Br5     | Pb1     | Br3              | 92.743(18)  |         |         |                  |             |

<sup>1</sup>+X,1/2-Y,1/2+Z; <sup>2</sup>+X,1/2-Y,-1/2+Z

## Definitions of intrinsic descriptors of molecular cations

**A<sub>2D</sub> steric footprint** (Å<sup>2</sup>): convex-hull area of the full idealized cation (all atoms) projected onto the best-fit molecular plane.

**L<sub>max</sub>** (Å): maximum pairwise atomic separation within the projected full cation.

**W<sub>min</sub>** (Å): Minimum width of the projected full cation, obtained from the convex hull.

**Aspect ratio, AR** (dimensionless):  $L_{\max} / W_{\min}$ .

**Radius of gyration, R<sub>g</sub>** (Å): Root-mean-square distance of all projected cation atoms from their geometric centroid.

**Effective radius, R<sub>eff</sub>** (Å):  $R_{\text{eff}} = (A_{2D} / \pi)^{(1/2)}$ , i.e., the radius of a circle with the same projected area.

**Donor density, ρ<sub>D</sub>, H donor per Å<sup>2</sup>**.  $D_{\text{HBD}} = N_{\text{HBD}} / A_{2D}$ , where  $N_{\text{HBD}}$  is the number of chemically relevant donor hydrogens.

**Donor-field asymmetry, P<sub>1</sub>**: Magnitude of the mean unit-vector sum of all relevant D–H bond vectors (D = N or polar C), taken from the geometric centroid of the full non-H cation scaffold:  $P_1 = |(1 / N_{\text{HBD}}) \sum_i u_i|$ . Small  $P_1$  indicates a nearly isotropic donor field; larger  $P_1$  indicates a more one-sided donor-field distribution.

**Donor-field axial anisotropy, P<sub>2</sub>**: Second angular moment of the donor-field distribution in the molecular plane:  $P_2 = |(1 / N_{\text{HBD}}) \sum_i \exp(2i\theta_i)|$ . Small  $P_2$  indicates a nearly azimuthally uniform donor field; larger  $P_2$  indicates stronger axial or lobed anisotropy.

**Donor-field eccentricity, E<sub>DF</sub>**. Distance between the geometric centroid of all relevant donor hydrogens and the geometric centroid of the full non-H cation scaffold, normalized by  $R_g$  of the non-H scaffold:

$$E_{\text{DF}} = |r_{\text{H,cent}} - r_{\text{o}}| / R_g(\text{non-H}).$$

Intrinsic descriptors were computed for idealized cations from MMFF-optimized planar geometries of the isolated protonated species. For  $P_1$ ,  $P_2$ , and  $E_{\text{DF}}$ , the reference point was the geometric centroid of all non-H atoms of the full cation. Size descriptors ( $A_{2D}$ ,  $L_{\max}$ ,  $W_{\min}$ ,  $AR$ ,  $R_g$ ,  $R_{\text{eff}}$ , and  $D_{\text{HBD}}$ ) were derived from the all-atom 2D footprint projected onto the best-fit molecular plane. Relevant donor H atoms were defined as follows:  $\text{AcA}^+$ , 4 N–H;  $\text{FA}^+$ , 4 × N–H + amidinium C–H;  $\text{Im}^+$ , 2 × N–H + 3 × ring C–H.

**Table S8. Intrinsic organic cation descriptors.**

| Descriptor                                                 | Acetamidinium (Aca <sup>+</sup> ) | Formamidinium (Aca <sup>+</sup> ) | Imidazolium (Im <sup>+</sup> ) |
|------------------------------------------------------------|-----------------------------------|-----------------------------------|--------------------------------|
| Intrinsic cation archetype                                 | ordered asymmetric amidinium      | symmetric amidinium template      | rigid imidazolium ring         |
| Relevant HBD count, $N_{\text{HBD}}$                       | 4                                 | 5                                 | 5                              |
| N–H donors count                                           | 4                                 | 4                                 | 2                              |
| Activated C–H donors count                                 | 0                                 | 1                                 | 3                              |
| Steric footprint $A_{2D}$ , Å <sup>2</sup>                 | 10.752                            | 7.405                             | 11.562                         |
| $L_{\text{max}}$ , Å                                       | 4.096                             | 4.055                             | 4.232                          |
| $W_{\text{min}}$ , Å                                       | 3.511                             | 2.707                             | 3.949                          |
| Aspect ratio, AR                                           | 1.166                             | 1.498                             | 1.072                          |
| Radius of gyration, $R_g$ , Å                              | 1.753                             | 1.567                             | 1.763                          |
| Effective radius, $R_{\text{eff}}$ , Å                     | 1.850                             | 1.535                             | 1.918                          |
| HBD density, $D_{\text{HBD}}$ , H-donor per Å <sup>2</sup> | 0.372                             | 0.675                             | 0.432                          |
| HBD-field asymmetry, $P_1$                                 | 0.446                             | 0.016                             | 0.024                          |
| HBD-field axial anisotropy, $P_2$                          | 0.337                             | 0.189                             | 0.045                          |
| HBD-field eccentricity, $E_{\text{DF}}$                    | 0.784                             | 0.057                             | 0.037                          |

**Table S9. Parameters of cation-framework coupling.**

| Descriptor                                    | Aca <sub>3</sub> PbBr <sub>5</sub> (100K) | FA <sub>3</sub> PbBr <sub>5</sub> | Im <sub>3</sub> PbBr <sub>5</sub> |
|-----------------------------------------------|-------------------------------------------|-----------------------------------|-----------------------------------|
| Ordered/disordered cation state               | ordered                                   | disorder-resolved                 | ordered                           |
| Mean plane–chain angle, deg (range)           | 22.8 (10.5–31.9)                          | 15.3 (5.1–31.4)                   | 27.4 (21.1–30.7)                  |
| Overall shortest donor⋯Br, Å                  | 3.377                                     | 2.837                             | 3.285                             |
| Overall shortest N⋯Br, Å                      | 3.377                                     | 2.837                             | 3.285                             |
| Overall shortest relevant C⋯Br, Å             | NA                                        | 3.399                             | 3.545                             |
| Shortest bridging donor⋯Br, Å                 | 3.459                                     | 3.593                             | 3.445                             |
| Shortest interchain Br⋯Br, Å [alignment, deg] | 4.429 [164.6]                             | 4.179 [146.4 / 122.5]             | 4.392 [177.9]                     |

**Table 10. Inorganic structure distortions.**

| Descriptor                                                      | Aca <sub>3</sub> PbBr <sub>5</sub> (100K) | FA <sub>3</sub> PbBr <sub>5</sub> | Im <sub>3</sub> PbBr <sub>5</sub> |
|-----------------------------------------------------------------|-------------------------------------------|-----------------------------------|-----------------------------------|
| Baur distortion index, D                                        | 0.01954                                   | 0.00361                           | 0.00931                           |
| Bond-angle variance, $\sigma_{\text{Oct}}^2$ , deg <sup>2</sup> | 24.41657                                  | 4.09000                           | 10.71000                          |
| Chain deviation from linearity, $D_{\text{chain}}$ , deg        | 23.51854                                  | 17.29200                          | 9.86100                           |
| Pb off-centering, $\delta_{\text{Pb}}$ , Å                      | 0.15908                                   | 0.00000                           | 0.08400                           |
| Transverse Pb off-centering, $\delta_{\text{Pb},\perp}$ , Å     | 0.09500                                   | 0.00000                           | 0.08000                           |

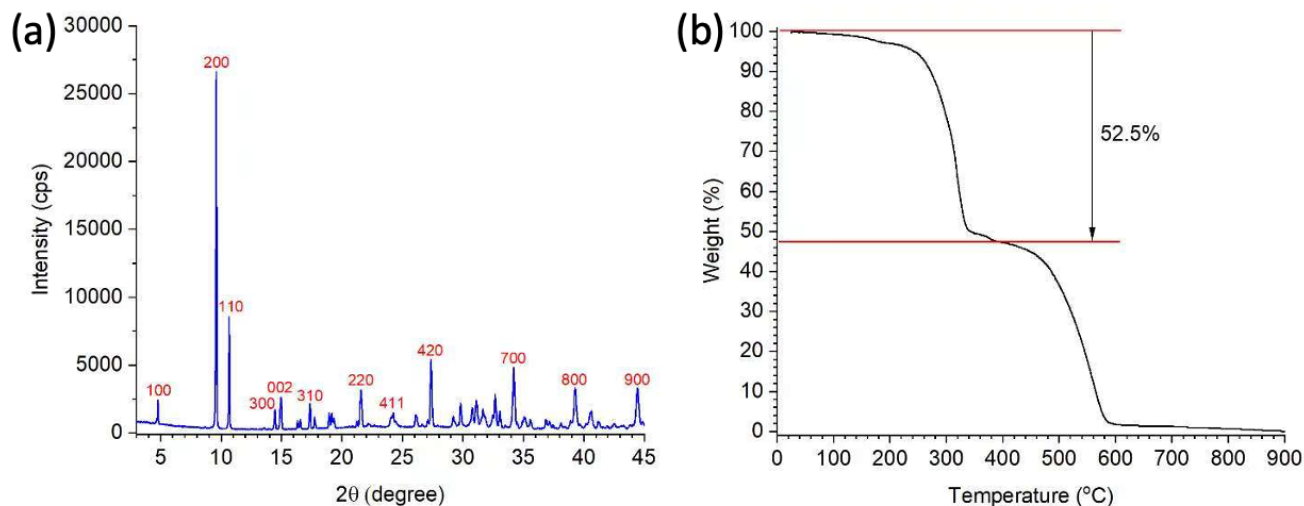

**Figure S1.** (a) X-ray diffraction pattern of  $Aca_3PbBr_5$ , (b) thermogravimetric analysis (TGA) curve showing thermal decomposition behavior.

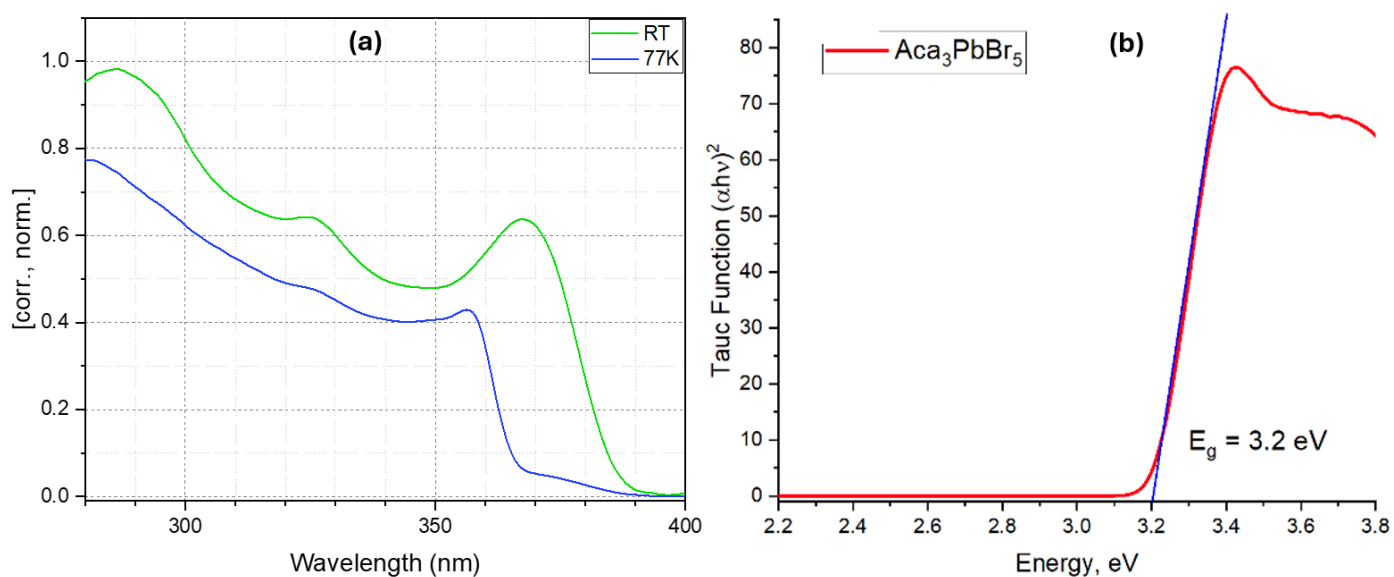

**Figure S2.** (a) PLE spectra of  $Aca_3PbBr_5$  at room temperature and at liquid nitrogen temperature, (b) Diffuse reflectance spectrum plotted in Tauc coordinates with estimated optical band gap of 3.2 eV.
